# Supplementary material
Source: PubMed Central journal article supplement (PMC6393187)
Supplement: NIHMS998131-supplement-Supp_TableS1.pdf [file NIHMS998131-supplement-Supp_TableS1.pdf]

## Supplemental Information for:

### Tree-sequence recording in SLiM opens new horizons for forward-time simulation of whole genomes

Benjamin C. Haller, Jared Galloway, Jerome Kelleher, Philipp W. Messer, and Peter L. Ralph

Table S1. Mean coalescence time, in generations, for a simple neutral model (Example 1; see text for model description). The mean, standard deviation (SD), standard error of the mean (SEM), and relative standard error (SE%) are shown across 500 replicates for each value of  $L$  simulated. Note that the relative standard error of the mean is below 2.5% in all cases, and below 1% for the largest values of  $L$ , so any error in the estimated mean coalescence times should not substantially affect the results shown in Figure 2. (It might seem simpler to have used SLiM's coalescence-detection feature to terminate the timing comparison runs directly; however, coalescence detection requires tree-sequence recording to be enabled, making it unusable in the SLiM runs that did not use tree-sequence recording. Also, coalescence detection entails additional performance costs that would have skewed the comparison; we expect that many models will not use coalescence detection, so its overhead should not be included in the timing comparison.)

| <u><math>L</math></u> | <u>mean</u> | <u>SD</u> | <u>SEM</u> | <u>SE%</u> |
|-----------------------|-------------|-----------|------------|------------|
| $10^5$                | 2708.8      | 1497.7    | 67.0       | 2.47%      |
| $10^6$                | 4743.0      | 1672.6    | 74.8       | 1.58%      |
| $10^7$                | 7897.6      | 1597.5    | 71.4       | 0.90%      |
| $10^8$                | 10647.4     | 1485.5    | 66.4       | 0.62%      |
| $10^9$                | 13310.4     | 1379.4    | 61.7       | 0.46%      |
| $10^{10}$             | 15771.0     | 1354.3    | 60.6       | 0.38%      |
